# Supplementary material for: The mineralization, drug release and in vivo bone defect repair properties of calcium phosphates/PLA modified tantalum scaffolds
Source: Royal Society of Chemistry journal article supplement (doi:10.1039/c9ra09385k), 2020-01-01
Supplement: c9ra09385k1.pdf [file c9ra09385k1.pdf]

**The Mineralization, Drug Release and *In Vivo* Bone Defect Repair Properties  
of Calcium Phosphate Nanomaterials/PLA Modified Tantalum Scaffolds**

Rong Zhou,<sup>1,2,#</sup> Hai-Jian Ni,<sup>3,#</sup> Jin-Hui Peng,<sup>1,\*</sup> Ning Liu,<sup>1</sup> Shu Chen,<sup>1</sup> Jia-Hua  
Shao,<sup>1</sup> Qi-Wei Fu,<sup>1</sup> Jun-Jian Liu,<sup>3</sup> Feng Chen,<sup>3,\*</sup> and Qi-Rong Qian<sup>1,\*</sup>

<sup>1</sup> Department of Orthopedics, Changzheng Hospital, Second Military Medical  
University, Shanghai, 200003, P.R. China

<sup>2</sup> Department of Orthopaedics, 72nd Group Army Hospital of PLA, No. 9 Chezhan  
Road, Wuxing District, Huzhou, 313000, P.R. China

<sup>3</sup> Department of Orthopedics, Spinal Pain Research Institute, Shanghai Tenth People's  
Hospital, Tongji University School of Medicine, Shanghai 200072, P.R. China

# These authors contributed equally to this work

Correspondence:

Email: pengjinhui20110@smmu.edu.cn (J.H. Peng)

fchen@tongji.edu.cn (F. Chen)

qianqr@smmu.edu.cn (Q.R. Qian)

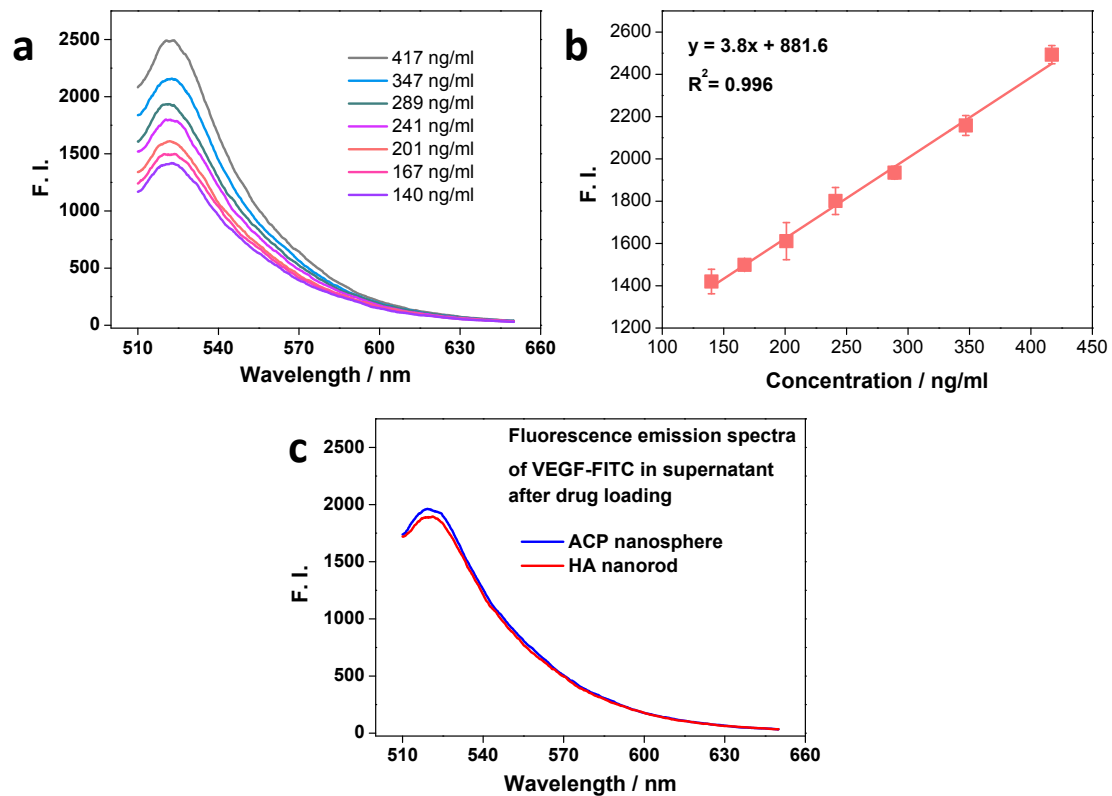

**Fig. S1** The measurement of VEGF-FITC adsorbed onto ACP nanospheres and HA nanorods. (a) The fluorescence emission spectra of VEGF-FITC solution with different concentration; (b) calibration curves obtained from (a); (c) The fluorescence emission spectra of VEGF-FITC in the supernatant of drug-loading solution, after centrifugal separation of ACP nanospheres and HA nanorods.
